# Supplementary material for: Regulation of Aquaporin-Mediated Water Transport in Arabidopsis Roots Exposed to NaCl
Source: Oxford University Press journal article supplement (doi:10.1093/pcp/pcv003), 2015-01-20
Supplement: pcv003_Supplementary_Data.zip [file pcv003_Supplementary_Data.zip]

Archive with 1 entries (1 files):
- pcp-2014-e-00558-File008.pdf
