# Supplementary material for: Regulation of Aquaporin-Mediated Water Transport in Arabidopsis Roots Exposed to NaCl
Source: Oxford University Press journal article supplement (doi:10.1093/pcp/pcv003), 2015-01-20
Supplement: pcv003_Supplementary_Data.zip [file pcv003_Supplementary_Data.zip › pcp-2014-e-00558-File008.pdf]

**Table S1.** Gene-specific primer pairs used in PCR.

| Gene   | Primer                                                                                  |
|--------|-----------------------------------------------------------------------------------------|
| PIP1;3 | Forward: 5'-GCTGTGGATGATCTGGTTTTATCG-3'<br>Reverse: 5'- ATTTGTACCGAACCAAACCAGAAG-3'     |
| PIP1;5 | Forward: 5'- CTTCTTGTTTCCTATGTCATGTG -3'<br>Reverse: 5'-GTACACAATGTATTCTTCCATTGAC-3'    |
| PIP2;1 | Forward: 5' - CAGTCACTTGCAGTTTTTCATTTCC-3'<br>Reverse: 5' - GTAAACACAACGCATAAGAACCTC-3' |
| PIP2;3 | Forward: 5'-CTTTTCCACTCGTATCTTAGCTTC-3'<br>Reverse : 5'-ATACACCAAACCTTACATACGTTGC-3'    |
| PIP2;7 | Forward: 5'-TGTAATGAGAGAGATGGTGGATTG-3'<br>Reverse: 5'-ACTAAGAGAAACCAAAGGCAAACG-3'      |

**Table S2.** Effects on cell elasticity ( $\epsilon$ ) of 5 mM  $\text{Ca}(\text{NO}_3)_2$  and 5 mM KF treatments in the wild-type *Arabidopsis* plants and in plants overexpressing PIP2;5. Different letters in each column for wild-type and transgenic plants indicate significant differences (ANOVA, Turkey,  $p = 0.05$ ). Values are means  $\pm$  SE ( $n = 7$  plants).

| Plants                     | $\epsilon$ (MPa)             |                              |                 |                 |
|----------------------------|------------------------------|------------------------------|-----------------|-----------------|
|                            | - $\text{Ca}(\text{NO}_3)_2$ | + $\text{Ca}(\text{NO}_3)_2$ | - KF            | + KF            |
| Wild-type                  | $4.1 \pm 0.7^a$              | $3.8 \pm 0.6^a$              | $3.7 \pm 0.8^b$ | $4.6 \pm 1.2^b$ |
| Overexpressing<br>PIP2;5-1 | $3.6 \pm 0.9^a$              | $3.9 \pm 0.9^a$              | $4.5 \pm 0.8^b$ | $4.6 \pm 1.1^b$ |

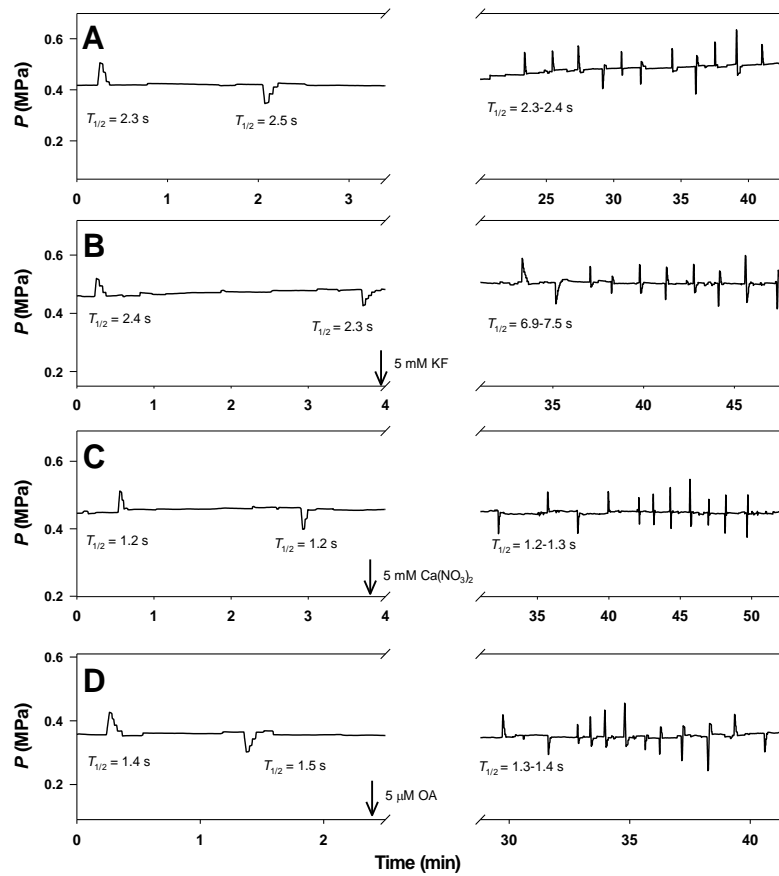

**Figure S1.** Typical responses of half-times for water exchange ( $T_{1/2}$ ) and elastic modulus ( $\epsilon$ ) in cortical cells of *Arabidopsis* roots.  $T_{1/2}$  is shown at about 0-20 min (A, D) and 0-35 min (B, C), and  $\epsilon$  measured at about 30-40 min (A, D), 40-50 min (B, C) is shown on the right side of the traces in the control (A), KF (B),  $\text{Ca}(\text{NO}_3)_2$  (C) and OA (D) treatments.

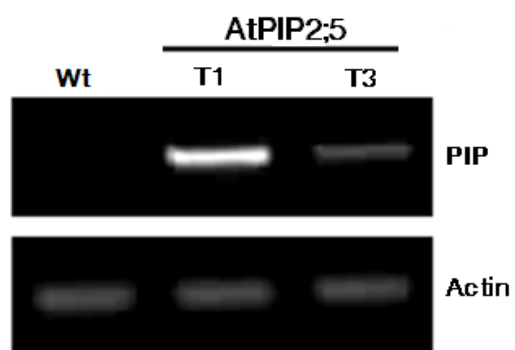

**Figure S2** Confirmation of the transgenic lines. RT-PCR analyses of the expression of PIP2;5 in the wild-type (Wt) plants and independent transgenic lines (T1 and T3) in 21-day old *Arabidopsis* plants grown in hydroponic culture.
